# Supplementary material for: Morphological and anatomical adaptations to dry, shady environments in Adiantum reniforme var. sinense (Pteridaceae)
Source: PeerJ. 2020 Sep 30;8:e9937. doi: 10.7717/peerj.9937 (PMC7532779; doi:10.7717/peerj.9937)
Supplement: Supplemental Information 1 [file peerj-08-9937-s001.xlsx]

## Sheet: Sheet1
sunny leaf
Leaf area
Length (cm)	4.7	4.4	4.7	5.1	4.3	4.64	0.31305
Width (cm)	3.8	3.8	3.7	4.5	3.6	3.88	0.356371
Thickness (μm)	211	230	172.8	201	230	208.96	23.772
Tissues thickness
Adaxial cuticle (μm)	1	1.5	2	1.8	1.2	1.5	0.412311
Abaxial cuticle (μm)	0.5	0.7	0.6	0.4	0.5	0.54	0.114018
Mesophyll (μm)	172.8	144	153.6	134.4	163.2	153.6	15.1789
Adaxial epidermis (μm)	19.2	15.36	9.6	9.6	11.52	13.056	4.16246
Abaxial epidermis (μm)	11.5	15.36	9.6	19.2	21.12	15.356	4.89899
Lignified adaxial epidermal wall (μm)	9.6	13.44	7.68	11.52	13.44	11.136	2.50337
Lignified abaxial epidermal wall (μm)	7.68	3.84	1.92	5.76	7.68	5.376	2.50337
Tissues density
Adaxial epidermis (n mm2)	323	264	273	292	260	282.4	25.8322
Abaxial epidermis (n mm2)	159	174	202	230	178	188.6	27.8173
Adaxial stomatal (n mm2)	no
Abaxial stomatal (n mm2)	49	43	39	47	51	45.8	4.81664
Marginal veins (n mm)	1.6	2	1.8	2.1	2	1.9	0.2
Epidermal features
Adaxial epidermis length (μm)	80	56	96	120	88	88	23.3238
Adaxial epidermis width (μm)	48	40	32	40	40	40	5.65685
Abaxial epidermis length (μm)	96	160	168	80	144	129.6	39.3548
Abaxial epidermis width (μm)	40	32	48	48	48	43.2	7.15542
Adaxial stomatal length (μm)	no
Adaxial stomatal width (μm)	no
Abaxial stomatal length (μm)	40	32	40	32	40	36.8	4.38178
Abaxial stomatal width (μm)	24	32	32	32	32	30.4	3.57771
shady leaf
Leaf area
Length (cm)	4.9	4.9	4.3	4.5	4.9	4.7	0.282843
Width (cm)	4.6	4.5	3.9	4	3.8	4.16	0.364692
Thickness (μm)	201	198	187	176	186	189.6	10.0648
Tissues thickness
Adaxial cuticle (μm)	1	1.4	1.5	1.2	1	1.22	0.228035
Abaxial cuticle (μm)	0.4	0.2	0.4	0.3	0.2	0.3	0.1
Mesophyll (μm)	125	142	116	124	140	129.4	11.1714
Adaxial epidermis (μm)	15	11	9.6	8.6	9	10.64	2.60154
Abaxial epidermis (μm)	12.6	11.6	14.2	13.5	15.2	13.42	1.39356
Lignified adaxial epidermal wall (μm)	12.6	10.2	8.2	7.9	14.2	10.62	2.74627
Lignified abaxial epidermal wall (μm)	5.6	7.2	6.4	6.8	5.2	6.24	0.829458
Tissues density
Adaxial epidermis (n mm2)	320	268	280	276	262	281.2	22.786
Abaxial epidermis (n mm2)	160	182	162	172	181	171.4	10.2859
Adaxial stomatal (n mm2)	no
Abaxial stomatal (n mm2)	33	32	30	29	25	29.8	3.11448
Marginal veins (n mm)	2.4	1.8	2.4	1.8	1.8	2.04	0.328634
Epidermal features
Adaxial epidermis length (μm)	90	92	88	88	86	88.8	2.28035
Adaxial epidermis width (μm)	50	52	48	36	38	44.8	7.29383
Abaxial epidermis length (μm)	120	124	98	96	88	105.2	15.8493
Abaxial epidermis width (μm)	40	45	48	50	52	47	4.69042
Adaxial stomatal length (μm)	no
Adaxial stomatal width (μm)	no
Abaxial stomatal length (μm)	40	40	32	40	40	38.4	3.57771
Abaxial stomatal width (μm)	32	40	32	40	40	36.8	4.38178
